# Supplementary material for: Mesoporous Zr-SBA-15 as a green solid acid catalyst for the Prins reaction
Source: Royal Society of Chemistry journal article supplement (doi:10.1039/c2cy20084h), 2012-01-01
Supplement: c2cy20084h.pdf [file c2cy20084h.pdf]

## **Supplementary data**

### **Mesoporous Zr-SBA-15 as green solid acid catalyst for Prins reaction**

Dong Minh Do, Stephan Jaenicke and Gaik-Khuan Chuah\*  
Department of Chemistry, National University of Singapore, 3 Science Drive 3,  
Kent Ridge, Singapore 117543  
e-mail: chmcgk@nus.edu.sg

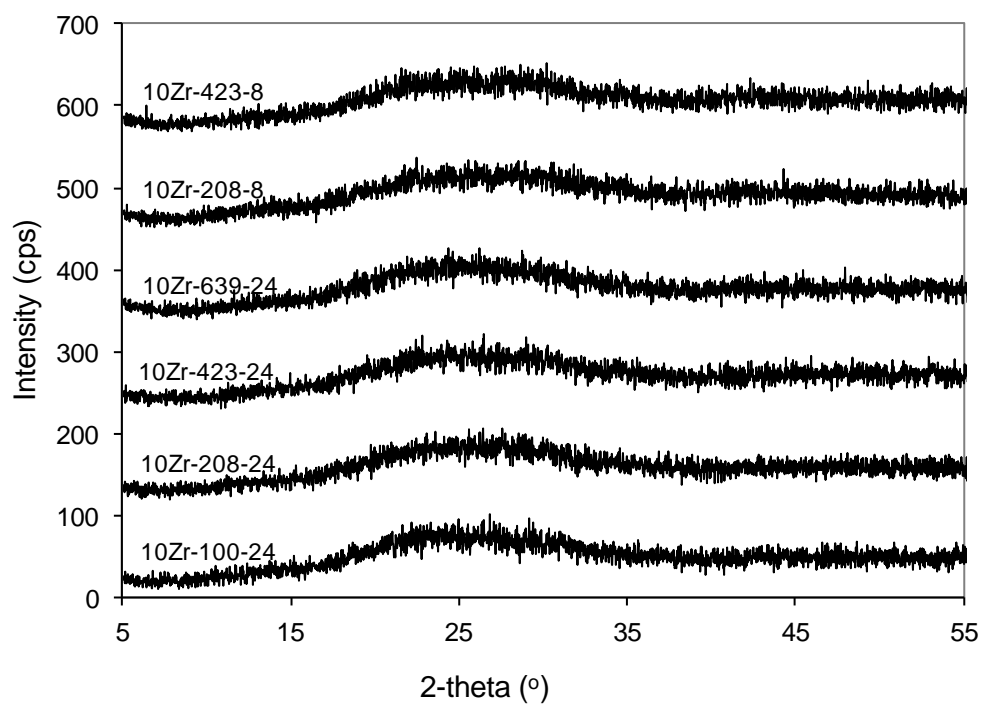

Fig. S1. Wide-angle XRD patterns of 10Zr-SBA samples (a) 10Zr-100-24 (b) 10Zr-208-24 (c) 10Zr-423-24 (d) 10Zr-639-24 (e) 10Zr-208-8 and (f) 10Zr-423-8.

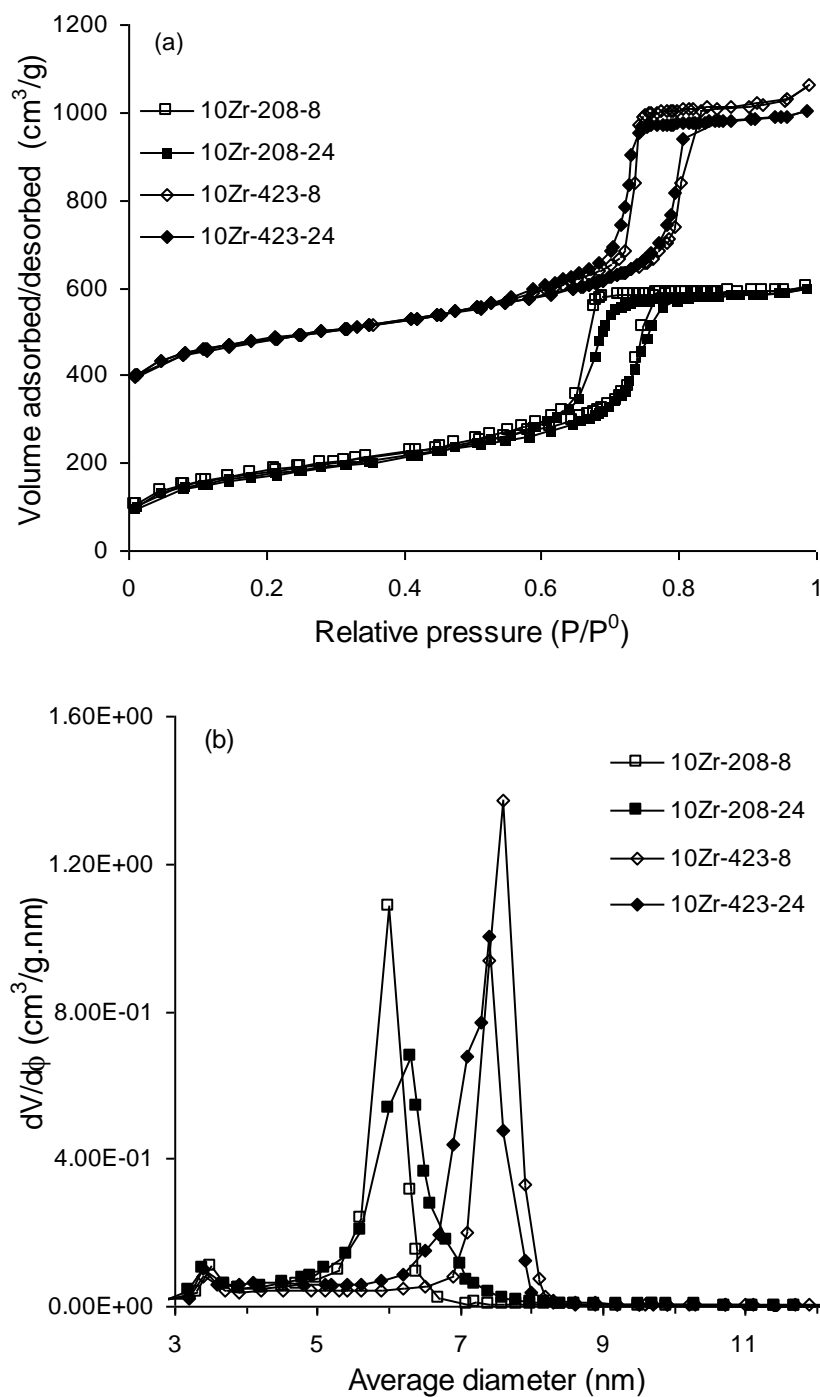

Fig. S2. (a)  $N_2$  adsorption–desorption isotherms and (b) pore size distribution of calcined 10Zr–208 and 10Zr–423 formed with 8 and 24 h aging time. Isotherms of 10Zr–423–8 and 10Zr–423–24 offset by 300  $cm^3/g$ .

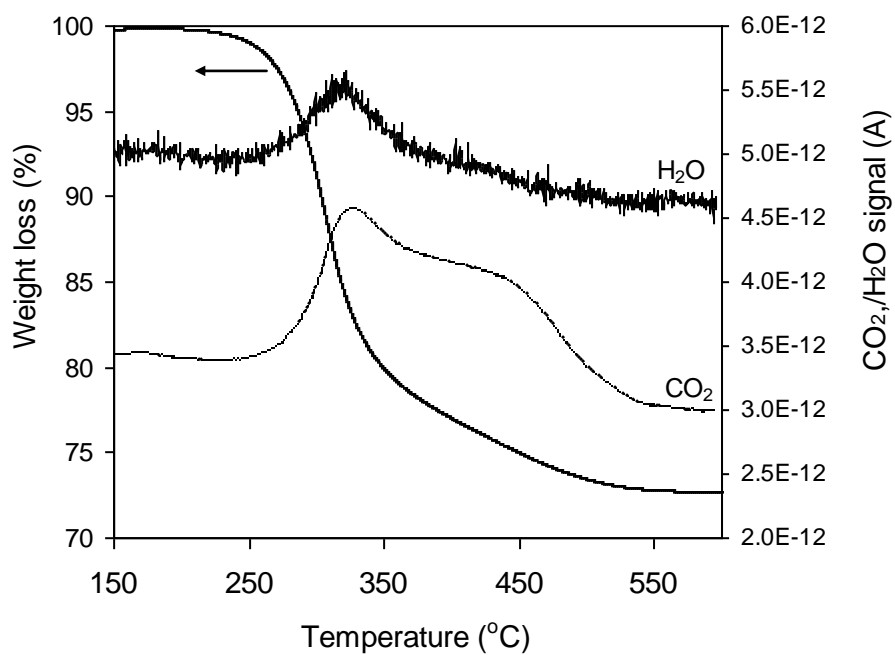

Fig. S3. TGA-MS of uncalcined 10Zr-100-24.

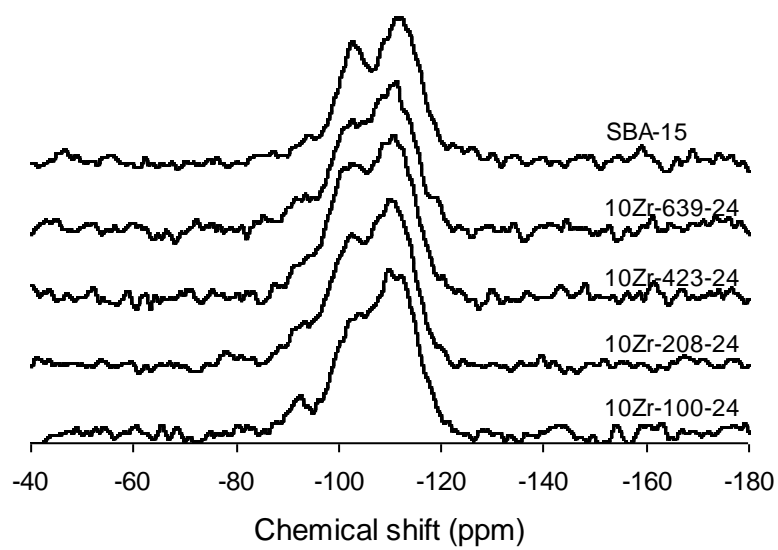

Fig. S4.  $^{29}\text{Si}$  NMR of Si-SBA-15 and 10Zr-SBA-15 samples.

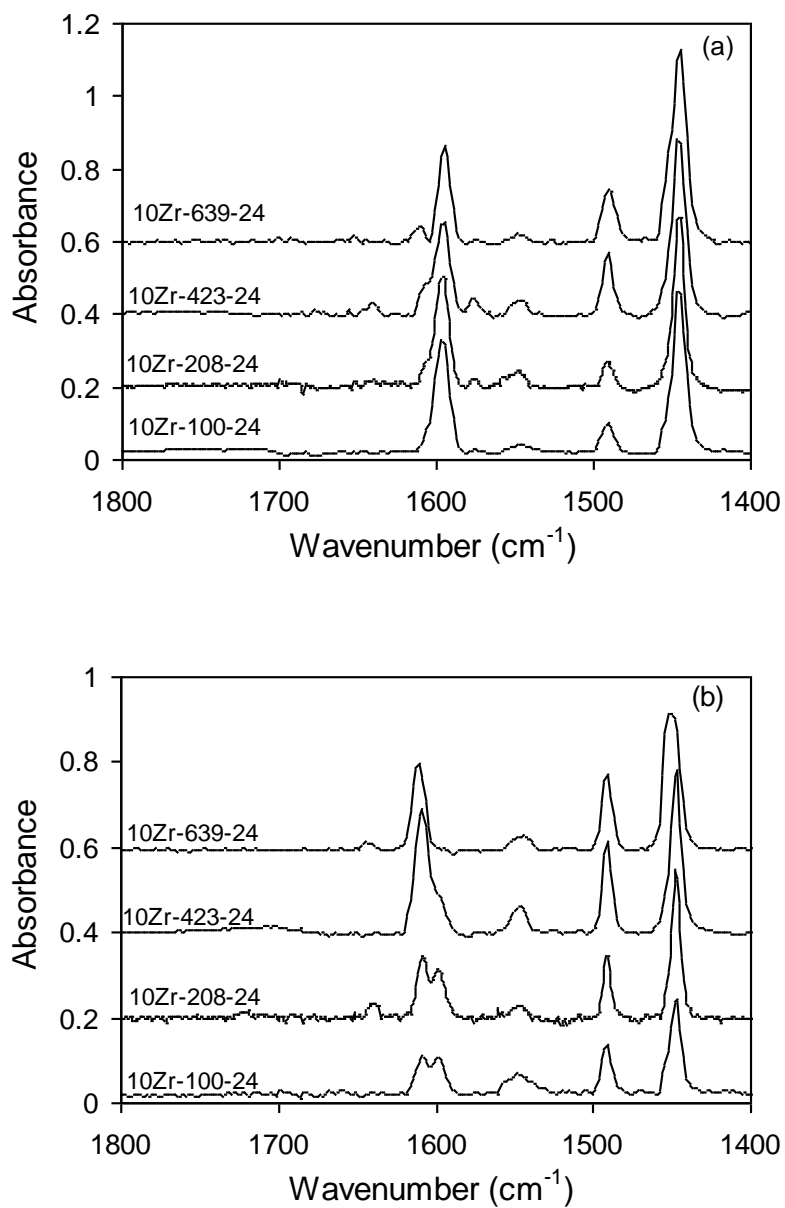

Fig. S5. Pyridine IR of 10Zr-SBA samples after pyridine adsorption followed by evacuation for 1 h at (a) room temperature and (b) 100 °C.

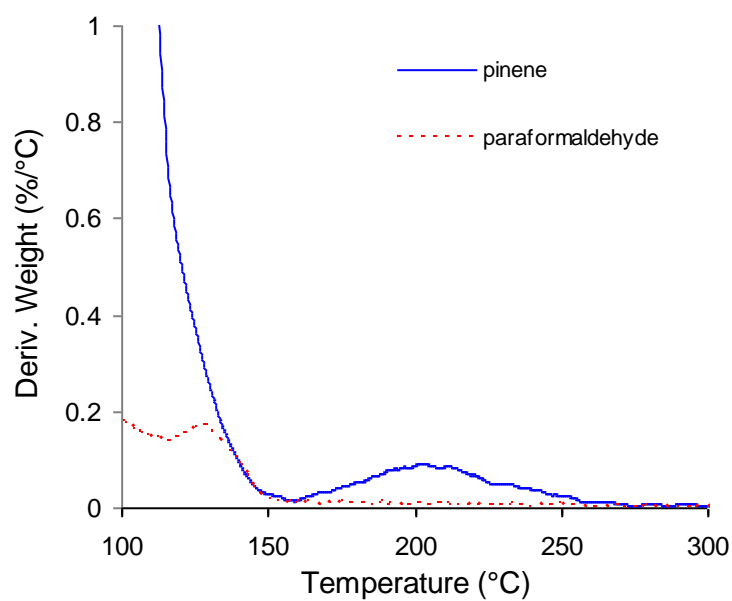

Fig. S6. Derivative weight loss versus temperature for  $\beta$ -pinene and formaldehyde adsorbed on 10Zr-423-8. Heat ramp at  $10\text{ }^{\circ}\text{C min}^{-1}$  from room temperature to  $500\text{ }^{\circ}\text{C}$  in  $\text{N}_2$ . Displayed curve is after subtraction from blank run of 10Zr-423-8.

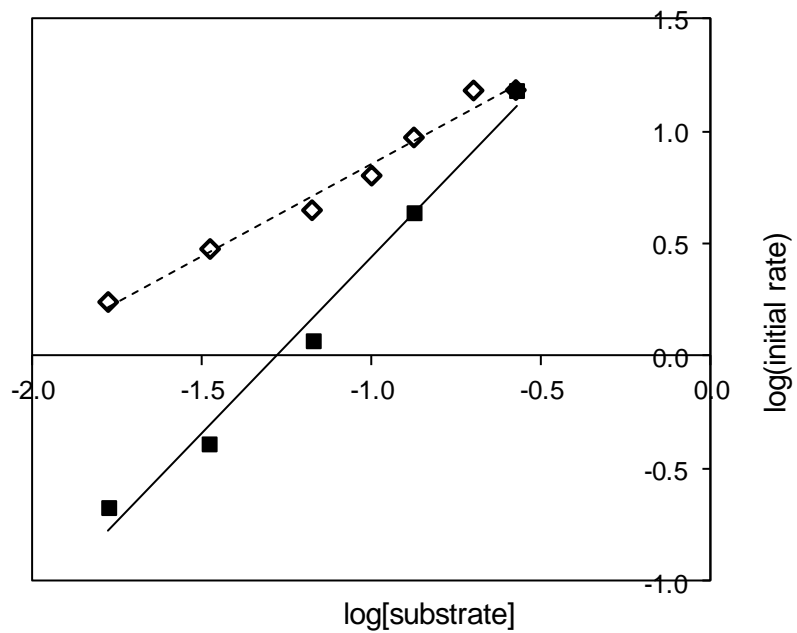

Fig. S7. Dependence of rate on concentration of (◇)  $\beta$ -pinene and (■) formaldehyde on 10Zr-423-8.



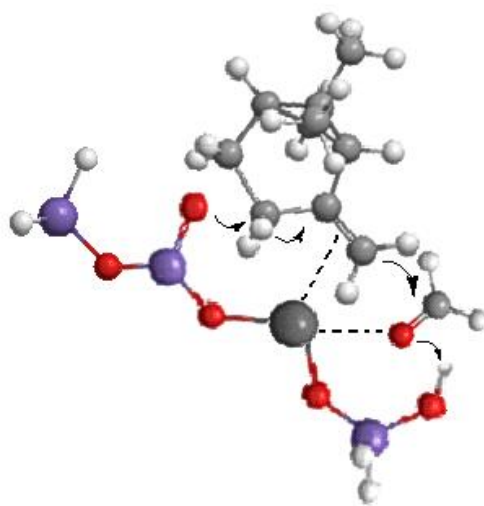

Fig. S8. Proposed coordination of  $\beta$ -pinene and formaldehyde at a zirconium site (dark grey sphere) leading to Nopol formation.

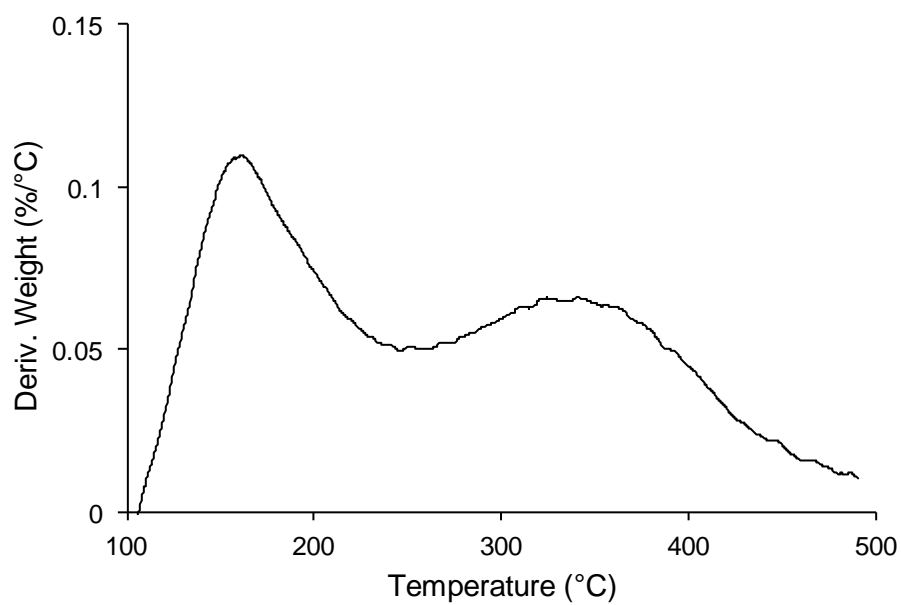

Fig. S9. Derivative weight loss versus temperature for 10Zr-423-8 after reaction, washing twice with 5 ml toluene and drying in N<sub>2</sub>. Heat ramp at 10 °C min<sup>-1</sup> from room temperature to 500 °C in N<sub>2</sub>. Displayed curve is after subtraction from blank run of 10Zr-423-8.
